# Supplementary material for: Automatically visualise and analyse data on pathways using PathVisioRPC from any programming environment
Source: PubMed Central journal article supplement (PMC4546821; doi:10.1186/s12859-015-0708-8), 2015-08-23
Supplement: 12859_2015_708_MOESM5_ESM.pdf [file 12859_2015_708_MOESM5_ESM.pdf]

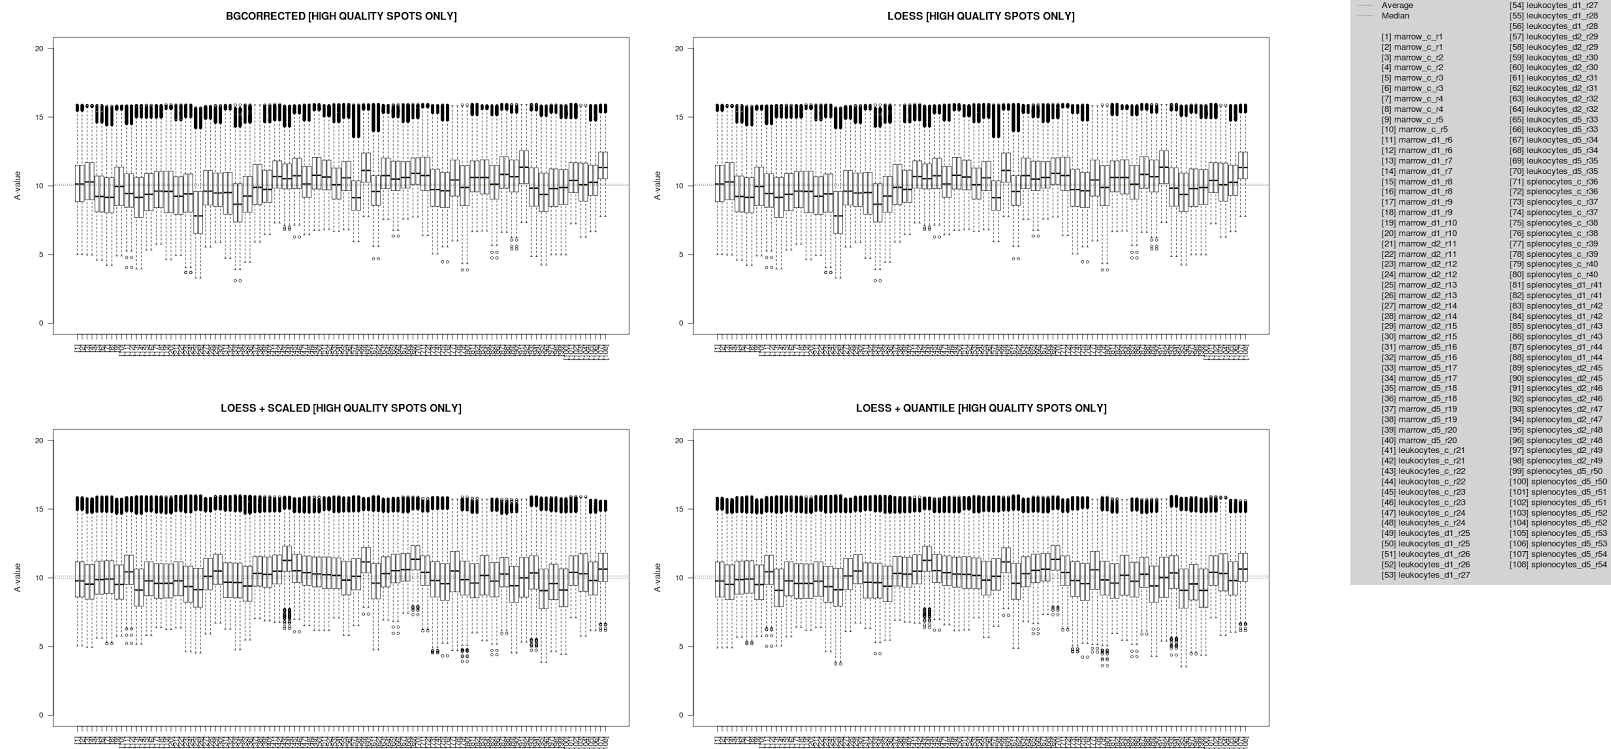

**Supplemental Fig. 1:** Box plots showing array quality control and normalization results using different normalization methods (BGCcorrected, Loess, Loess + Scale, Loess + Quantile). The normalized data table and flags data table are available at [http://projects.bigcat.unimaas.nl/data/pathvisiorpc/data/arrayQC\\_normData.table](http://projects.bigcat.unimaas.nl/data/pathvisiorpc/data/arrayQC_normData.table) and [http://projects.bigcat.unimaas.nl/data/pathvisiorpc/data/arrayQC\\_flags.table](http://projects.bigcat.unimaas.nl/data/pathvisiorpc/data/arrayQC_flags.table) respectively.
