# Supplementary material for: Automatically visualise and analyse data on pathways using PathVisioRPC from any programming environment
Source: PubMed Central journal article supplement (PMC4546821; doi:10.1186/s12859-015-0708-8), 2015-08-23
Supplement: 12859_2015_708_MOESM8_ESM.pdf [file 12859_2015_708_MOESM8_ESM.pdf]

**Title:** Oxidative Stress  
**Organism:** *Mus musculus*

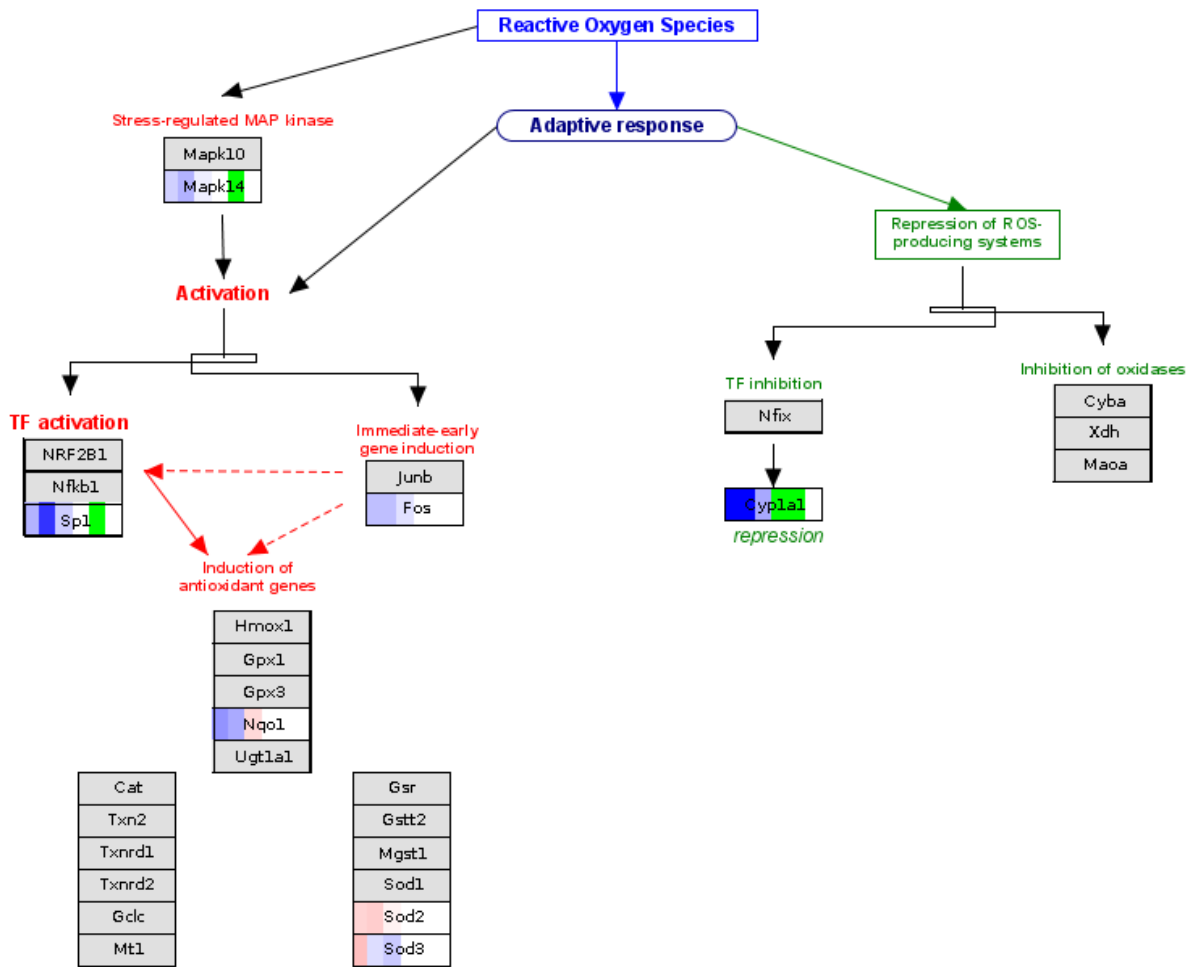

**Supplemental Fig. 2:** Oxidative Stress Pathway (WP412) in Splenocytes after cyclophosphamide treatment vs. control comparison (*Mus musculus*). Oxidative Stress Pathway ranks in 7<sup>th</sup> position of relevant pathways with a z-score of 2.08 at 1 day of treatment, making it a highly-relevant pathway in the experimental conditions.
